# Supplementary material for: Echocardiographic Assessment of Cardiac Function and Reserve Under Exercise in Post–COVID-19 Children: A Prospective Cross-sectional Study
Source: PubMed Central journal article supplement — CJC Pediatr Congenit Heart Dis. 2024 Aug 9;3(5):203–13. doi: 10.1016/j.cjcpc.2024.08.001 (PMC11602614; doi:10.1016/j.cjcpc.2024.08.001), 2024-08-09
Supplement: mmc1.pdf [file mmc1.pdf]

**Table S1: Correlation coefficient with peak  $\dot{V}O_2$** 

|                                  | r      | P-value |
|----------------------------------|--------|---------|
| Age                              | 0.259  | 0.01    |
| Heart rate                       | -0.354 | 0.01    |
| <b>Resting echocardiography</b>  |        |         |
| EF (m-S) (%)                     | 0.164  | 0.28    |
| SV (ml/m <sup>2</sup> )          | 0.326  | 0.03    |
| CS (%)                           | 0.020  | 0.89    |
| LS (%)                           | 0.041  | 0.77    |
| LV septal s' (cm/sec)            | -0.244 | 0.09    |
| E/e'                             | 0.012  | 0.90    |
| TAPSE (mm)                       | 0.009  | 0.95    |
| FAC of RV (%)                    | -0.007 | 0.96    |
| <b>Exercise echocardiography</b> |        |         |
| max/base BP                      | 0.101  | 0.47    |
| max/base HR                      | 0.306  | 0.02    |
| max/base CS                      | 0.096  | 0.50    |
| max/base LS                      | -0.150 | 0.30    |
| max/base s'                      | 0.078  | 0.58    |

Abbreviations:  $\dot{V}O_2$ , oxygen consumption; r, Pearson correlation coefficient or Spearman's rank correlation coefficient; EF, ejection fraction; SV, stroke volume; CS, circumferential strain; LS, longitudinal strain; LV, left ventricle;  $s'$ , peak systolic mitral annular velocity;  $E/e'$ , ratio of early diastolic velocity of mitral inflow and early diastolic velocity of mitral annular motion; TAPSE, tricuspid annular plane systolic excursion; FAC, fractional area change; RV, right ventricle; BP, blood pressure; HR, heart rate; max/base, the maximum value during exercise divided by the baseline value before the start of exercise.

**Table S2: Intraclass correlation coefficients for intra- and inter-observer reliability**

| Parameter      | Intra (95% CI)     | Inter (95% CI)     |
|----------------|--------------------|--------------------|
| Rest LV CS     | 0.88 (0.72 - 0.95) | 0.92 (0.80 - 0.97) |
| Rest LV GLS    | 0.86 (0.68 - 0.94) | 0.87 (0.69 - 0.95) |
| Rest LV LS     | 0.79 (0.54 - 0.91) | 0.93 (0.78 - 0.97) |
| Rest RVS       | 0.72 (0.43 - 0.89) | 0.74 (0.46 - 0.89) |
| Exercise LV CS | 0.76 (0.59 - 0.87) | 0.62 (0.38 - 0.78) |
| Exercise LV LS | 0.83 (0.71 - 0.91) | 0.75 (0.58 - 0.86) |

Abbreviations: CI, confidential interval; LV, left ventricle; CS, circumferential strain; (G)LS, (global) longitudinal strain; RVS, right ventricle strain.

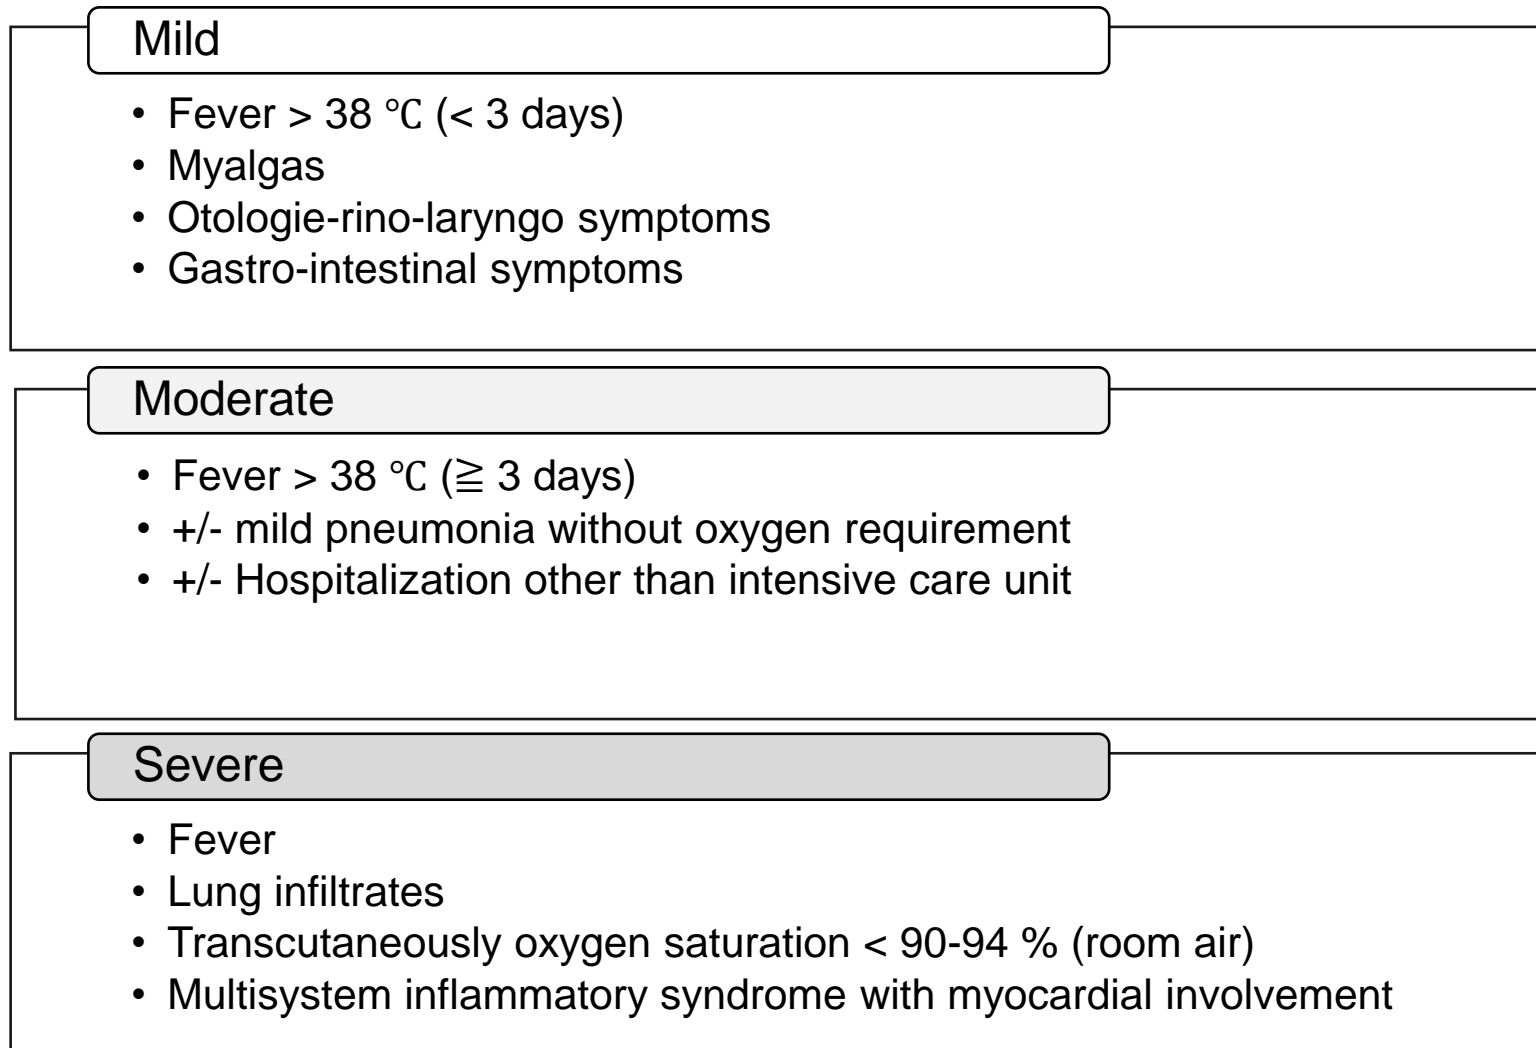

**Figure S1 : Severity score in the acute phase of COVID-19 infection**  
Partially reorganized reference 11.

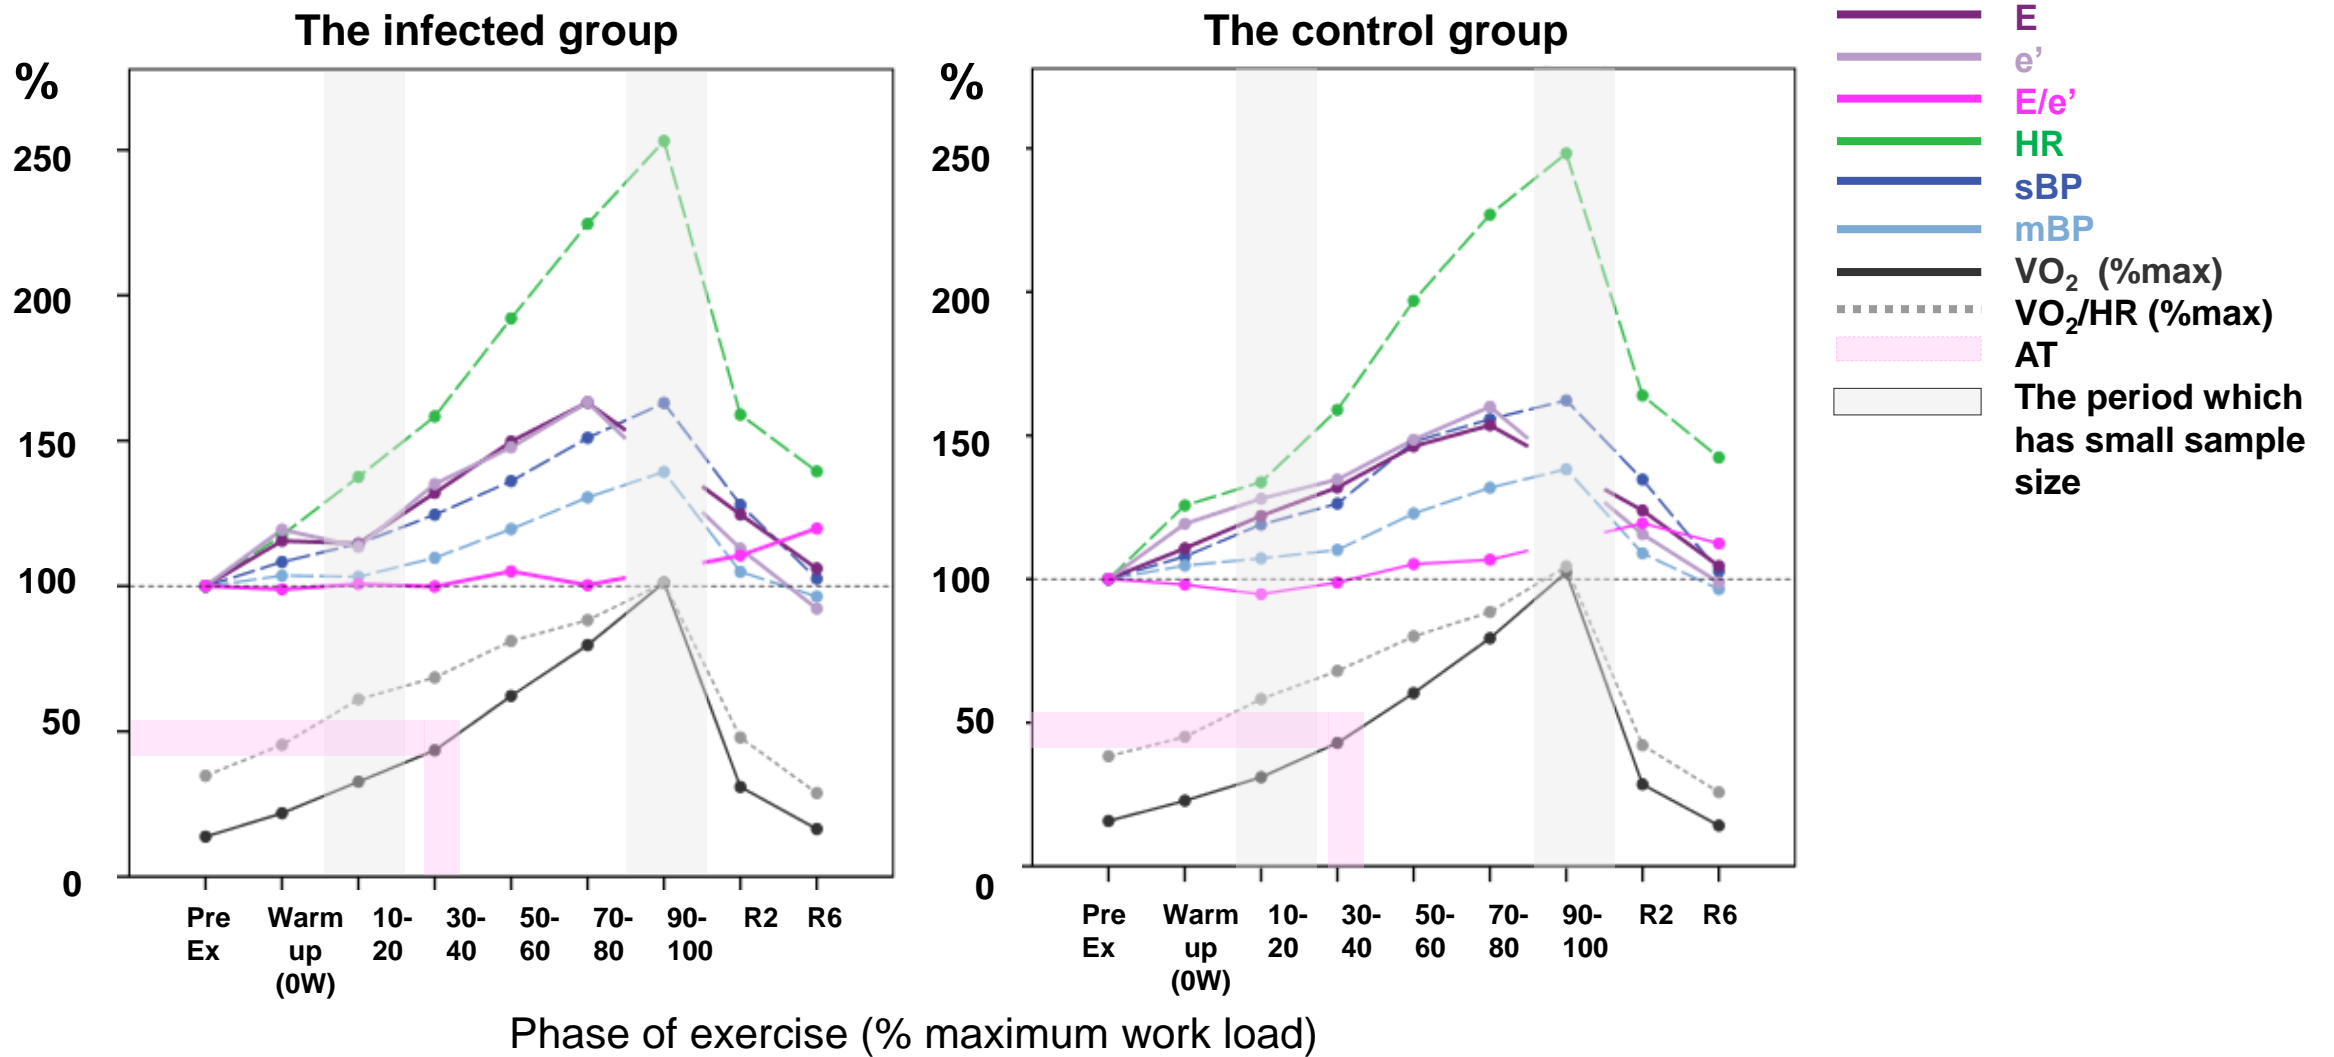

**Figure S2: Rate of diastolic parameters in LV and cardiovascular reaction during exercise (value under exercise/baseline (%))**

The structure of the figure is the same as in Fig. 3.

Abbreviations: E, early diastolic velocity of mitral inflow; e', early diastolic velocity of mitral annular motion.
